# Supplementary material
Source: Springer Nature journal article supplement (https://www.springermedizin.de/resource/supplementary/12875_2008_302_MOESM1_ESM.pdf/9436706)
Supplement: MOESM1 [file 9436706]

**LUNG CANCER PATIENTS**  
246

**INCIDENTAL DIAGNOSES**  
(no presentations with a clinical feature of lung cancer, including respiratory symptoms)  
26

Emergency referrals  
15

Out-Patient referrals  
10

Private health check  
1

Patients had presented to their GP with  $\geq$  one clinical feature of lung cancer within the previous year

Medical 4  
Surgical 2  
Gastrology 2  
Elderly 1  
Rheum' 1

Unspecified\*  
10

**1st REFERRAL (DEPARTMENT)**  
220

Respiratory OPD  
110

Other OPD  
40

Internal Referrals  
4

Emergency Referrals  
56

ENT 11  
Surgical 7  
Elderly 7  
Cardiology 6  
Medical 5  
Gastrology 3  
Urology 1

Respiratory 2  
ENT 1  
Cardiology 1

GP emergency admission 44  
41 admitted with respiratory symptoms  
3 admitted with non-respiratory symptoms

Self referral to A&E 12  
11 admitted with respiratory symptoms  
1 admitted with non-respiratory symptoms

Respiratory Referrals with preceding PC CXR  
104

no malignancy suspected  
17

malignancy suspected  
87
